# Supplementary material for: In Silico Model for Chemical-Induced Chromosomal Damages Elucidates Mode of Action and Irrelevant Positives
Source: MDPI journal article supplement (doi:10.3390/genes11101181), 2020-10-11
Supplement: s1 [file s1]

Table S1. List of chemicals

| Category                                 | No. | CAS No.     | Chemical name                                              |    |
|------------------------------------------|-----|-------------|------------------------------------------------------------|----|
| Positive result chemicals<br>(positives) | 1   | 50-32-8     | Benzo[a]pyrene                                             | *1 |
|                                          | 2   | 53-96-3     | 2-Acetylaminofluorene                                      | *1 |
|                                          | 3   | 95-80-7     | 2,4-Diaminotoluene                                         | *1 |
|                                          | 4   | 1162-65-8   | Aflatoxin B1                                               | *1 |
|                                          | 5   | 57-97-6     | 7,12-Dimethylbenzanthracene                                | *1 |
|                                          | 6   | 123-31-9    | Hydroquinone                                               | *1 |
|                                          | 7   | 66-27-3     | MMS                                                        | *1 |
|                                          | 8   | 62-75-9     | Dimethylnitrosamine                                        | *1 |
|                                          | 9   | 759-73-9    | ENU                                                        | *1 |
|                                          | 10  | 106-47-8    | p-Chloroaniline—free base and HCl salt                     | *1 |
|                                          | 11  | 33419-42-0  | Etoposide                                                  | *1 |
|                                          | 12  | 76180-96-6  | IQ (2-amino-3-methylimidazo[4,5-f]quinoline)               | *1 |
|                                          | 13  | 6055-19-2   | Cyclophosphamide                                           | *1 |
|                                          | 14  | 105650-23-5 | PhIP.HCl (2-amino-1-methyl-6-phenylimidazo [4,5-b]pyridine | *1 |
|                                          | 15  | 30516-87-1  | Azidothymidine                                             | *1 |
|                                          | 16  | 33069-62-4  | Taxol                                                      | *1 |
|                                          | 17  | 50-07-7     | Mitomycin C                                                | *1 |
|                                          | 18  | 56-57-5     | 4-Nitroquinoline-N-oxide                                   | *1 |
|                                          | 19  | 64-86-8     | Colchicine                                                 | *1 |
|                                          | 20  | 143-67-9    | Vinblastine sulfate                                        | *1 |
|                                          | 21  | 147-94-4    | Cytosine arabinoside                                       | *1 |
|                                          | 22  | 51-21-8     | 5-Fluorouracil                                             | *1 |
|                                          | 23  | 591-27-5    | 3-Aminophenol                                              | *2 |
|                                          | 24  | 123-30-8    | 4-Aminophenol                                              | *2 |
|                                          | 25  | 112-26-5    | 1,2-Bis(2-chloroethoxy)ethane                              | *2 |
|                                          | 26  | 38640-62-9  | Bis(1-methylethyl)naphthalene                              | *2 |
|                                          | 27  | 95-31-8     | N-tert-Butyl-2-benzothiazolesulfenamide                    | *2 |
|                                          | 28  | 88-60-8     | 6-tert-Butyl-m-cresol                                      | *2 |
|                                          | 29  | 611-19-8    | 1-Chloro-2-(chloromethyl)benzene                           | *2 |
|                                          | 30  | 1570-64-5   | 4-Chloro-o-cresol                                          | *2 |
|                                          | 31  | 87-84-3     | Chloropentabromocyclohexane                                | *2 |
|                                          | 32  | 106-48-9    | 4-Chlorophenol                                             | *2 |
|                                          | 33  | 91-76-9     | 2,4-Diamino-6-phenyl-s-triazine                            | *2 |
|                                          | 34  | 109-64-8    | 1,3-Dibromopropane                                         | *2 |
|                                          | 35  | 760-23-6    | 3,4-Dichloro-1-butene                                      | *2 |
|                                          | 36  | 3209-22-1   | 1,2-Dichloro-3-nitrobenzene                                | *2 |
|                                          | 37  | 89-61-2     | 1,4-Dichloro-2-nitrobenzene                                | *2 |
|                                          | 38  | 4979-32-2   | N,N-Dicyclohexyl-2-benzothiazolesulfenamide                | *2 |
|                                          | 39  | 298-06-6    | O,O'-Diethyl dithiophosphate                               | *2 |
|                                          | 40  | 623-91-6    | Diethyl fumarate                                           | *2 |
|                                          | 41  | 2439-35-2   | 2-(Dimethylamino)ethyl acrylate                            | *2 |
|                                          | 42  | 793-24-8    | N-(1,3-Dimethylbutyl)-N'-phenyl-p-phenylenediamine         | *2 |
|                                          | 43  | 5124-25-4   | Disperse Yellow 42                                         | *2 |
|                                          | 44  | 106-91-2    | 2,3-Epoxypropyl methacrylate                               | *2 |
|                                          | 45  | 156-43-4    | 4-Ethoxybenzeneamine (p-phenetidin)                        | *2 |
|                                          | 46  | 84-51-5     | 2-Ethylanthraquinone                                       | *2 |
|                                          | 47  | 123-07-9    | 4-Ethylphenol                                              | *2 |
|                                          | 48  | 126-98-7    | Methacrylonitrile (methyl acrylonitrile)                   | *2 |
|                                          | 49  | 4461-52-3   | Methoxymethanol                                            | *2 |
|                                          | 50  | 101-14-4    | 4,4'-Methylenebis(2-chloroaniline)                         | *2 |
|                                          | 51  | 1333-16-0   | Methylenediphenol                                          | *2 |
|                                          | 52  | 556-61-6    | Methyl isothiocyanate                                      | *2 |
|                                          | 53  | 2581-34-2   | 3-Methyl-4-nitrophenol                                     | *2 |
|                                          | 54  | 108-39-4    | 3-Methylphenol (m-cresol)                                  | *2 |
|                                          | 55  | 97-52-9     | 4-Nitro-o-anisidine                                        | *2 |
|                                          | 56  | 13936-21-5  | 2-Pentylanthraquinone                                      | *2 |
|                                          | 57  | 941-69-5    | N-Phenylmaleimide                                          | *2 |
|                                          | 58  | 101-72-4    | N-Phenyl-N'-isopropyl-p-phenylenediamine                   | *2 |
|                                          | 59  | 118-79-6    | 2,4,6-Tribromophenol                                       | *2 |
|                                          | 60  | 100-69-6    | 2-Vinylpyridine                                            | *2 |
|                                          | 61  | 99-09-2     | 3-Nitrobenzenamine                                         | *2 |
|                                          | 62  | 111-41-1    | N-(Aminoethyl)ethanolamine                                 | *2 |
|                                          | 63  | 81-16-3     | 2-Amino-1-naphthalenesulfonic acid                         | *2 |

|                                       |     |             |                                                              |   |        |
|---------------------------------------|-----|-------------|--------------------------------------------------------------|---|--------|
|                                       | 64  | 109-70-6    | 1-Bromo-3-chloropropane                                      |   | *2     |
|                                       | 65  | 2867-47-2   | 2-(Dimethylamino)ethyl methacrylate                          |   | *2     |
|                                       | 66  | 87-59-2     | 2,3-Dimethylaniline                                          |   | *2     |
|                                       | 67  | 87-62-7     | 2,6-Dimethylaniline (2,6-xylydine)                           |   | *2     |
|                                       | 68  | 108-69-0    | 3,5-Dimethylaniline (3,5-xylydine)                           |   | *2     |
|                                       | 69  | 26630-87-5  | Disperse Red 206                                             |   | *2     |
|                                       | 70  | 536-90-3    | 3-Methoxybenzeneamine                                        |   | *2     |
|                                       | 71  | 80-51-3     | 4,4'-Oxybis(benzenesulfonylhydrazide)                        |   | *2     |
|                                       | 72  | 4189-44-0   | Thiourea dioxide                                             |   | *2     |
|                                       | 73  | 26471-62-5  | Tolylene diisocyanate (toluene diisocyanate)                 |   | *2     |
|                                       | 74  | 88-89-1     | 2,4,6-Trinitrophenol (picric acid)                           |   | *2     |
|                                       | 75  | 92-88-6     | 4,4'-Biphenyldiol                                            |   | *2     |
|                                       | 76  | 89-72-5     | o-sec-Butylphenol                                            |   | *2     |
|                                       | 77  | 98-54-4     | p-tert-Butylphenol                                           |   | *2     |
|                                       | 78  | 620-17-7    | 3-Ethylphenol                                                |   | *2     |
|                                       | 79  | 90-02-8     | 2-Hydroxybenzaldehyde                                        |   | *2     |
|                                       | 80  | 2216-69-5   | 1-Methoxynaphthalene                                         |   | *2     |
|                                       | 81  | 620-92-8    | 4,4'-Methylenediphenol                                       |   | *2     |
|                                       | 82  | 50957-96-5  | Phosphoric acid, dodecyl ester, sodium salt                  |   | *2     |
|                                       | 83  | 3048-65-5   | 3a,4,7,7a-Tetrahydro-1H-indene                               |   | *2     |
|                                       | 84  | 108-73-6    | 1,3,5-Trihydroxybenzene                                      |   | *2     |
|                                       | 85  | 56-93-9     | Benzyltrimethylammonium chloride                             |   | *2     |
|                                       | 86  | 85-41-6     | Phthalimide                                                  |   | *2     |
|                                       | 87  | 88-18-6     | 2-tert-Butylphenol                                           |   | *2, *3 |
|                                       | 88  | 4286-23-1   | 4-(1-Methylethenyl)phenol                                    |   | *2, *3 |
|                                       | 89  | 26444-49-5  | Diphenyl cresyl phosphate                                    |   | *2     |
|                                       | 90  | 95-50-1     | o-Dichlorobenzene                                            |   | *2, *3 |
|                                       | 91  | 75-50-3     | Trimethylamine                                               |   | *2     |
|                                       | 92  | 100-61-8    | N-Methylaniline                                              |   | *2     |
|                                       | 93  | 78-97-7     | 2-Hydroxypropanenitrile                                      |   | *2     |
|                                       | 94  | 103-83-3    | N,N-Dimethylbenzylamine                                      |   | *2     |
|                                       | 95  | 105-99-7    | Dibutyl adipate                                              |   | *2     |
|                                       | 96  | 41267-43-0  | C.I. Fluorescent brightner 271                               |   | *2     |
|                                       | 97  | 2768-02-7   | Ethenyltrimethoxysilane                                      |   | *2     |
|                                       | 98  | 27676-62-6  | 1,3,5-Tris(3,5-di-tertbutyl-4-hydroxybenzyl)isocyanuric acid |   | *2     |
|                                       | 99  | 103-69-5    | N-Ethylaniline                                               |   | *2     |
|                                       | 100 | 105-45-3    | Methyl acetoacetate                                          |   | *2     |
|                                       | 101 | 121-45-9    | Trimethoxyphosphine                                          |   | *2     |
|                                       | 102 | 583-39-1    | 2-Mercaptobenzimidazole                                      |   | *2     |
|                                       | 103 | 10108-64-2  | Cadmium chloride                                             | † | *1     |
|                                       | 104 | 15663-27-1  | Cisplatin                                                    | † | *1     |
|                                       | 105 | 7784-46-5   | Sodium arsenite                                              | † | *1     |
|                                       | 106 | 10022-68-1  | Cadmium nitrate tetrahydrate                                 | † | *2     |
|                                       | 107 | 7789-12-0   | Chromic acid disodium salt dihydrate                         | † | *2     |
|                                       | 108 | 7803-57-8   | Hydrazine monohydrate                                        | † | *2     |
| Negative result chemicals (negatives) | 109 | 75-65-0     | Tert-butyl alcohol                                           |   | *1     |
|                                       | 110 | 61-82-5     | Amitrole                                                     |   | *1     |
|                                       | 111 | 117-81-7    | Di-(2-ethylhexyl)phthalate                                   |   | *1     |
|                                       | 112 | 67-72-1     | Hexachloroethane                                             |   | *1     |
|                                       | 113 | 5989-27-5   | D-Limonene                                                   |   | *1     |
|                                       | 114 | 69-65-8     | D-mannitol                                                   |   | *1     |
|                                       | 115 | 108-78-1    | Melamine                                                     |   | *1     |
|                                       | 116 | 598-55-0    | Methyl carbamate                                             |   | *1     |
|                                       | 117 | 999-81-5    | (2-chloroethyl)trimethyl-ammoniumchloride                    |   | *1     |
|                                       | 118 | 110-86-1    | Pyridine                                                     |   | *1     |
|                                       | 119 | 111-42-2    | Diethanolamine                                               |   | *1     |
|                                       | 120 | 1212-29-9   | N,N-dicyclohexyl thiourea                                    |   | *1     |
|                                       | 121 | 134-72-5    | Ephedrinesulphate/hydrochloride                              |   | *1     |
|                                       | 122 | 7177-48-2   | Ampicillin trihydrate                                        |   | *1     |
|                                       | 123 | 643-22-1    | Erythromycin/erythromycinsteareate                           |   | *1     |
|                                       | 124 | 834-28-6    | Phenformin HCl                                               |   | *1     |
|                                       | 125 | 124937-51-5 | Tolterodine                                                  |   | *1     |
|                                       | 126 | 15307-79-6  | Sodium diclofenac                                            |   | *1     |
|                                       | 127 | 68291-97-4  | Zonisamide                                                   |   | *1     |
|                                       | 128 | 91374-21-9  | Ropinirole                                                   |   | *1     |

|     |             |                                                            |    |
|-----|-------------|------------------------------------------------------------|----|
| 129 | 287714-41-4 | Rosuvastatin                                               | *1 |
| 130 | 97240-79-4  | Topiramate                                                 | *1 |
| 131 | 107753-78-6 | Zafirlukast                                                | *1 |
| 132 | 82-45-1     | 1-Aminoanthraquinone                                       | *2 |
| 133 | 115-70-8    | 2-Amino-2-ethyl-1,3-propanediol                            | *2 |
| 134 | 87-02-5     | 7-Amino-4-hydroxy-2-naphthalenesulfonic acid               | *2 |
| 135 | 78-67-1     | 2,2'-Azobis(2-methylpropionitrile)                         | *2 |
| 136 | 1477-55-0   | 1,3-Bis(aminomethyl) benzene                               | *2 |
| 137 | 6731-36-8   | 1,1-Bis(tert-butylldioxy)-3,3,5-trimethylcyclohexane       | *2 |
| 138 | 1552-42-7   | 3,3-Bis(p-dimethylaminophenyl)-6-dimethylaminophthalide    | *2 |
| 139 | 103-24-2    | Bis(2-ethylhexyl) azelate                                  | *2 |
| 140 | 80-43-3     | Bis(1-methyl-1-phenylethyl) peroxide                       | *2 |
| 141 | 110-30-5    | 1,2-Bis(staeroylamino) ethane                              | *2 |
| 142 | 584-03-2    | 1,2-Butanediol                                             | *2 |
| 143 | 110-63-4    | 1,4-Butanediol                                             | *2 |
| 144 | 7580-85-0   | 2-tert-Butoxyethanol                                       | *2 |
| 145 | 88-85-7     | 2-sec-Butyl-4,6-dinitrophenol                              | *2 |
| 146 | 97-88-1     | Butyl methacrylate                                         | *2 |
| 147 | 1879-09-0   | 6-tert-Butyl-2,4-xlenol                                    | *2 |
| 148 | 683-10-3    | N-(Carboxymethy)-N,N-dimethyl-1-dodecanaminium, inner salt | *2 |
| 149 | 109-69-3    | 1-Chlorobutane                                             | *2 |
| 150 | 6448-95-9   | C.I.Pigment Red 22                                         | *2 |
| 151 | 461-58-5    | Cyanoguanidine                                             | *2 |
| 152 | 100-54-9    | 3-Cyanopyridine                                            | *2 |
| 153 | 110-83-8    | Cyclohexene                                                | *2 |
| 154 | 95-33-0     | N-Cyclohexyl-2-benzothiazolesulfenamide                    | *2 |
| 155 | 5281-04-9   | D&C Red No. 7                                              | *2 |
| 156 | 123-42-2    | Diacetone alcohol                                          | *2 |
| 157 | 526-78-3    | 2,3-Dibromosuccinic acid                                   | *2 |
| 158 | 107-66-4    | Dibutyl phosphate                                          | *2 |
| 159 | 95-73-8     | 2,4-Dichloro-1-methylbenzene                               | *2 |
| 160 | 611-06-3    | 2,4-Dichloronitrobenzene                                   | *2 |
| 161 | 118-69-4    | 2,6-Dichlorotoluene                                        | *2 |
| 162 | 626-17-5    | 1,3-Dicyanobenzene                                         | *2 |
| 163 | 623-26-7    | 1,4-Dicyanobenzene                                         | *2 |
| 164 | 538-75-0    | Dicyclohexylcarbodiimide                                   | *2 |
| 165 | 77-73-6     | Dicyclopentadiene                                          | *2 |
| 166 | 211495-85-1 | Dicyclopentylsilanediol                                    | *2 |
| 167 | 105-05-5    | 1,4-Diethylbenzene                                         | *2 |
| 168 | 28575-17-9  | Diethylbiphenyl                                            | *2 |
| 169 | 134-62-3    | N,N-Diethyl-m-toluamide                                    | *2 |
| 170 | 3648-21-3   | Diheptyl phthalate                                         | *2 |
| 171 | 111-03-5    | 2,3-Dihydroxypropyl 9-cis-octadecenoate                    | *2 |
| 172 | 25321-09-9  | Diisopropylbenzene                                         | *2 |
| 173 | 95-64-7     | 3,4-Dimethylaniline (3,4-Xylidine)                         | *2 |
| 174 | 840-65-3    | Dimethyl 2,6-naphthalenedicarboxylate                      | *2 |
| 175 | 6165-51-1   | 1,4-Dimethyl-2-(1-phenylethyl) benzene                     | *2 |
| 176 | 126-30-7    | 2,2-Dimethyl-1,3-propanediol                               | *2 |
| 177 | 102-06-7    | 1,3-Diphenylguanidine                                      | *2 |
| 178 | 882-33-7    | Diphenyl disulfide                                         | *2 |
| 179 | 1241-94-7   | Diphenyl 2-ethylhexyl phosphate                            | *2 |
| 180 | 6106-21-4   | Disodium succinate hexahydrate                             | *2 |
| 181 | 119-06-2    | Ditridecyl phthalate                                       | *2 |
| 182 | 1321-74-0   | Divinylbenzene                                             | *2 |
| 183 | 112-85-6    | Docosanoic acid                                            | *2 |
| 184 | 5707-44-8   | 4-Ethylbiphenyl                                            | *2 |
| 185 | 688-84-6    | 2-Ethylhexyl methacrylate                                  | *2 |
| 186 | 77-99-6     | 2-Ethyl-2-hydroxymeth-1,3-propanediol                      | *2 |
| 187 | 16219-75-3  | 5-Ethylidene-2-norbornene                                  | *2 |
| 188 | 96-29-7     | Ethyl methyl ketoxime                                      | *2 |
| 189 | 100-74-3    | 4-Ethylmorpholine                                          | *2 |
| 190 | 4390-04-9   | 2,2,4,4,6,8,8-Heptamethylnonane                            | *2 |
| 191 | 544-76-3    | n-Hexadecane                                               | *2 |
| 192 | 1843-05-6   | 2-Hydro-4-(octyloxy)benzophenone                           | *2 |
| 193 | 3846-71-7   | 2-(2'-Hydroxy-3',5'-di-tert-butylphenyl) benzotriazole     | *2 |

|     |            |                                                                   |    |
|-----|------------|-------------------------------------------------------------------|----|
| 194 | 96-45-7    | 2-Imidazolidinethione                                             | *2 |
| 195 | 108-80-5   | Isocyanuric acid                                                  | *2 |
| 196 | 79-94-7    | 4,4'-Isopropylidenebis (2,6-dibromophenol)                        | *2 |
| 197 | 79-39-0    | Methacrylamide                                                    | *2 |
| 198 | 123-11-5   | 4-Methoxybenzaldehyde                                             | *2 |
| 199 | 56539-66-3 | 3-Methoxy-3-methyl-1-butanol                                      | *2 |
| 200 | 70-55-3    | 4-Methylbenzenesulfonamid                                         | *2 |
| 201 | 111-82-0   | Methyl dodecanoate                                                | *2 |
| 202 | 98-83-9    | 1-Methylethenylbenzene                                            | *2 |
| 203 | 99-88-7    | 4-(1-Methylethyl) aniline                                         | *2 |
| 204 | 109-59-1   | 2-(1-Methylethoxy) ethanol                                        | *2 |
| 205 | 121-03-9   | 2-Methyl-5-nitrobenzenesulfonic acid                              | *2 |
| 206 | 4457-71-0  | 3-Methyl-1,5-pentanediol                                          | *2 |
| 207 | 691-37-2   | 4-Methy-1-pentene                                                 | *2 |
| 208 | 599-64-4   | 4-(1-Methyl-1-phenylethyl) phenol                                 | *2 |
| 209 | 99-71-8    | 4-(1-Methylpropyl)phenol                                          | *2 |
| 210 | 5460-09-3  | Monosodium 4-amino-5-hydroxy-2,7-naphthalenedisulfonate           | *2 |
| 211 | 6099-57-6  | 1-Naphthol-4-sulfonic acid sodium salt                            | *2 |
| 212 | 119-47-1   | 2,2'-Nethylenebis(6-tert-butyl-p-cresol)                          | *2 |
| 213 | 25154-52-3 | Nonylphenol                                                       | *2 |
| 214 | 111-88-6   | 1-Octanethiol                                                     | *2 |
| 215 | 140-66-9   | p-tert-Octylphenol                                                | *2 |
| 216 | 629-62-9   | n-Pentadecane                                                     | *2 |
| 217 | 115-77-5   | Pentaerythritol                                                   | *2 |
| 218 | 7299-99-2  | Pentaerythritol tetra(2-ethylhexanoate)                           | *2 |
| 219 | 3586-14-9  | 3-Phenoxytoluene                                                  | *2 |
| 220 | 147-14-8   | Phthalocyanine Blue                                               | *2 |
| 221 | 14832-14-5 | Pigment Green No.7 (Hexadecachloro)                               | *2 |
| 222 | 1328-53-6  | Pigment Green No.7 (Plychloro, unspecified)                       | *2 |
| 223 | 6505-28-8  | Pigment Orange 16                                                 | *2 |
| 224 | 842-18-2   | Potassium 7-hydroxy-1,3-naphthalenedisulfonate                    | *2 |
| 225 | 108-65-6   | Propylene glycol monomethyl ether acetate                         | *2 |
| 226 | 12033-89-5 | Silicone nitride                                                  | *2 |
| 227 | 130-13-2   | Sodium 4-amino-1-naphthalenesulfonate                             | *2 |
| 228 | 4016-24-4  | Sodium 1-methoxycarbonylpentadecane-2-sulfonate                   | *2 |
| 229 | 135-51-3   | Sodium 2-naphthol-3,6-disulfonate                                 | *2 |
| 230 | 127-68-4   | Sodium 3-nitrobenzenesulfonate                                    | *2 |
| 231 | 657-84-1   | Sodium p-toluenesulfonate                                         | *2 |
| 232 | 79-27-6    | Tetrabromoethane                                                  | *2 |
| 233 | 97-99-4    | Tetrahydrofurfuryl alcohol                                        | *2 |
| 234 | 11070-44-3 | Tetrahydromethyl-1,3-isobenzofuranedione                          | *2 |
| 235 | 126-33-0   | Tetrahydrothiophene 1,1-dioxide                                   | *2 |
| 236 | 75-59-2    | Tetramethylammonium hydroxide                                     | *2 |
| 237 | 96-69-5    | 4,4'-Thiobis(6-tert-butyl-m-cresol)                               | *2 |
| 238 | 111-17-1   | 3,3'-Thiobispropanoic acid                                        | *2 |
| 239 | 110-02-1   | Thiophene                                                         | *2 |
| 240 | 88-19-7    | o-Toluenesulfonamide                                              | *2 |
| 241 | 108-44-1   | m-Toluidine                                                       | *2 |
| 242 | 98-08-8    | Trifluoromethylbenzene                                            | *2 |
| 243 | 526-73-8   | 1,2,3-Trimethylbenzene                                            | *2 |
| 244 | 95-63-6    | 1,2,4-Trimethylbenzene                                            | *2 |
| 245 | 6846-50-0  | 2,2,4-Trimethyl-1,3-pentanediol diisobutyrate                     | *2 |
| 246 | 512-56-1   | Trimethyl phosphate                                               | *2 |
| 247 | 1066-40-6  | Trimethylsilanol                                                  | *2 |
| 248 | 89-04-3    | Trioctylbenzene-1,2,4-tricarboxylate                              | *2 |
| 249 | 76-83-5    | Triphenylchloromethane                                            | *2 |
| 250 | 24800-44-0 | Tripropylene glycol                                               | *2 |
| 251 | 78-51-3    | Tris(2-butoxyethyl) phosphate                                     | *2 |
| 252 | 26967-76-0 | Tris(p-cumenyl) phosphate                                         | *2 |
| 253 | 3319-31-1  | Tris(2-ethylhexyl) 1,2,4-benzenetricarboxylate                    | *2 |
| 254 | 78-42-2    | Tris(2-ethylhexyl) phosphate                                      | *2 |
| 255 | 839-90-7   | 1,3,5-Tris(2-hydroxyethyl)-1,3,5-triazine-2,4,6-(1H,3H,5H)-trione | *2 |
| 256 | 77-85-0    | 1,1,1-Tris(hydroxymethyl)ethane                                   | *2 |
| 257 | 1025-15-6  | 1,3,5-Tris(2-propenyl) isocyanuric acid                           | *2 |
| 258 | 1120-21-4  | Undecane                                                          | *2 |

|                                                                           |     |             |                                                   |   |        |
|---------------------------------------------------------------------------|-----|-------------|---------------------------------------------------|---|--------|
|                                                                           | 259 | 8007-18-9   | C.I.Pigment Yellow 53                             | † | *2     |
|                                                                           | 260 | 7550-35-8   | Lithium bromide                                   | † | *2     |
|                                                                           | 261 | 39430-27-8  | Nickel(II) carbonate hydroxide tetrahydrate       | † | *2     |
|                                                                           | 262 | 13472-30-5  | Tetrasodium monosilicate hydrate                  | † | *2     |
|                                                                           | 263 | 7756-94-7   | Triisobutylene                                    | † | *2     |
|                                                                           | 264 | 122852-42-0 | Alosetron                                         | † | *1     |
|                                                                           | 265 | 688046-61-9 | Pyriofenone                                       | † | *1     |
| Misleading or irrelevant positive result chemicals (misleading positives) | 266 | 27813-02-1  | Methacrylic acid, monoester with propane-1,2-diol |   | *2     |
|                                                                           | 267 | 106-37-6    | 1,4-Dibromobenzene                                |   | *2     |
|                                                                           | 268 | 121-47-1    | 3-Aminobenzenesulfonic acid                       |   | *2     |
|                                                                           | 269 | 88-53-9     | 2-Amino-5-chloro-4-methylbenzenesulfonic acid     |   | *2     |
|                                                                           | 270 | 88-44-8     | 2-Amino-5-methylbenzenesulfonic acid              |   | *2     |
|                                                                           | 271 | 102-76-1    | Glycerol triacetate                               |   | *2     |
|                                                                           | 272 | 99-96-7     | 4-Hydroxybenzoic acid                             |   | *2     |
|                                                                           | 273 | 86-87-3     | 1-Naphthylacetic acid                             |   | *2     |
|                                                                           | 274 | 585-07-9    | tert-Butyl-methacrylate                           |   | *2     |
|                                                                           | 275 | 101-83-7    | Dicyclohexylamine                                 |   | *2     |
|                                                                           | 276 | 868-77-9    | 2-Hydroxyethyl methacrylate                       |   | *2     |
|                                                                           | 277 | 91-15-6     | 1,2-Dicyanobenzene                                |   | *2     |
|                                                                           | 278 | 105-16-8    | 2-(Diethylamino)ethyl methacrylate                |   | *2     |
|                                                                           | 279 | 5039-78-1   | (Methacryloyloxyethyl)trimethylammonium chloride  |   | *2     |
|                                                                           | 280 | 95-57-8     | 2-Chlorophenol                                    |   | *2     |
|                                                                           | 281 | 102-81-8    | 2-(Di-n-butylamino)ethanol                        |   | *2     |
|                                                                           | 282 | 51-28-5     | 2,4-Dinitrophenol                                 |   | *2     |
|                                                                           | 283 | 88-09-5     | 2-Ethylbutyric acid                               |   | *2     |
|                                                                           | 284 | 824-78-2    | p-Nitrophenol sodium salt                         |   | *2     |
|                                                                           | 285 | 1338-41-6   | Sorbitan monooleate                               |   | *2     |
|                                                                           | 286 | 99-94-5     | 4-Methylbenzoic acid                              |   | *2, *3 |
|                                                                           | 287 | 80-09-1     | 4,4'-Sulfonyldiphenol                             |   | *2, *3 |
|                                                                           | 288 | 97-39-2     | 1,3-Bis(2-methylphenyl)guanidine                  |   | *2, *3 |
|                                                                           | 289 | 2403-88-5   | 2,2,6,6-Tetramethyl-4-hydroxypiperidine           |   | *2, *3 |
|                                                                           | 290 | 83-32-9     | Acenaphthene                                      |   | *2, *3 |
|                                                                           | 291 | 95-32-9     | 2-(4-Morpholinylthio)benzothiazole                |   | *2, *3 |
|                                                                           | 292 | 2416-94-6   | 2,3,6-Trimethylphenol                             |   | *2, *3 |
|                                                                           | 293 | 96-76-4     | 2,4-Di-tert-butylphenol                           |   | *2, *3 |
|                                                                           | 294 | 93-68-5     | o-Acetoacetotoluidine                             |   | *2, *3 |
|                                                                           | 295 | 89-83-8     | Thymol                                            |   | *2, *3 |
|                                                                           | 296 | 99-04-7     | 3-Methylbenzoic acid                              |   | *2, *3 |
|                                                                           | 297 | 118-92-3    | o-Anthranilic acid                                |   | *1     |
|                                                                           | 298 | 100-51-6    | Benzyl alcohol                                    |   | *1     |
|                                                                           | 299 | 536-33-4    | Ethionamide                                       |   | *1     |
|                                                                           | 300 | 140-88-5    | Ethyl acrylate                                    |   | *1     |
|                                                                           | 301 | 97-53-0     | Eugenol                                           |   | *1     |
|                                                                           | 302 | 15356-70-4  | d,l-Menthol                                       |   | *1     |
|                                                                           | 303 | 108-46-3    | 1,3-Dihydroxybenzene(resorcinol)                  |   | *1     |
|                                                                           | 304 | 127-69-5    | Sulfisoxazole                                     |   | *1     |
|                                                                           | 305 | 57-13-6     | Urea                                              |   | *1     |
|                                                                           | 306 | 100-02-7    | p-Nitrophenol                                     |   | *1     |
|                                                                           | 307 | 94-96-2     | 2-Ethyl-1,3-hexanediol                            |   | *1     |
|                                                                           | 308 | 1948-33-0   | Tertiarybutylhydroquinone                         |   | *1     |
|                                                                           | 309 | 78-84-2     | Isobutyraldehyde                                  |   | *1     |
|                                                                           | 310 | 128-44-9    | Sodium saccharin                                  |   | *1     |
|                                                                           | 311 | 113-92-8    | Chlorpheniramine maleate                          |   | *1     |
|                                                                           | 312 | 124-64-1    | Tetrakis(hydroxymethyl)phosphonium chloride       |   | *1     |
|                                                                           | 313 | 97-77-8     | Tetraethylthiuramdisulfide [AKAdisulfiram]        |   | *1     |
|                                                                           | 314 | 13939-25-8  | Triphosphoric acid aluminium salt                 | † | *2     |
|                                                                           | 315 | 7782-63-0   | Ferrous sulfate heptahydrate                      | † | *2     |

\*1 Kirkland 2016; \*2 Morita 2012; \*3 Fujita 2016

† These chemicals were eliminated for model development because they did not have OFGs.
