# Supplementary material for: In Silico Model for Chemical-Induced Chromosomal Damages Elucidates Mode of Action and Irrelevant Positives
Source: Genes (Basel). 2020 Oct 11;11(10):1181. doi: 10.3390/genes11101181 (PMC7650694; doi:10.3390/genes11101181)
Supplement: Supplementary file 1 [file genes-11-01181-s001.zip › genes-945224 Table S2.xlsx]

## Sheet: Table S2
Table S2. Feature selection by elastic net model
OFGs	Pearson's correlation R				Coefficients in Ridge model				Coefficients in Elastic net model				Selected OFGs by Elastic-net
	P	MP	N		P	MP	N		P	MP	N		P	MP	N
Nitrobenzene	0.215365	-0.0870388	-0.129219		0.550672	-0.255126	-0.295545		1.19542	0	0		1	0	0
Unsaturated heterocyclic amine	0.177189	-0.0876857	-0.0904025		0.515019	-0.290877	-0.224142		1.36183	0	0		1	0	0
Ether	0.171626	-0.170546	-0.00282899		0.256094	-0.366331	0.110237		0.298642	-0.800491	0		1	1	0
Alkyl halide	0.154908	-0.154369	-0.00212202		0.588462	-0.552132	-0.0363306		0.908647	-0.95519	0		1	1	0
Alkoxy	0.154842	-0.0989439	-0.0569133		0.26581	-0.0798349	-0.185976		0.0171926	0	-0.209962		1	0	1
Cycloketone	0.148325	-0.105166	-0.0442372		0.416404	-0.237458	-0.178946		0.954807	0	0		1	0	0
Unsaturated heterocyclic fragment	0.145238	-0.0264619	-0.119048		0.336095	-0.00850997	-0.327585		0.777884	0	-0.0803932		1	0	1
Aromatic amine	0.133793	-0.0996546	-0.0351606		0.825009	-0.553634	-0.271375		1.84306	-0.488385	0		1	1	0
Fused heterocyclic aromatic	0.133485	-0.0660578	-0.0681045		0.686187	-0.336539	-0.349648		2.21252	0	0		1	0	0
Pyrrolidine	0.133485	-0.0660578	-0.0681045		0.513283	-0.298566	-0.214717		0.661886	0	0		1	0	0
Isocyanate	0.133485	-0.0660578	-0.0681045		1.02362	-0.488986	-0.534639		2.12082	0	0		1	0	0
Amidine	0.122615	-0.0810885	-0.0423577		0.84072	-0.53472	-0.306		2.1211	0	0		1	0	0
Phenol	0.118144	0.013642	-0.131646		0.187215	0.0551861	-0.242401		0.11426	0	-0.540481		1	0	1
Imide	0.118041	-0.0938474	-0.0251563		0.506277	-0.309102	-0.197175		1.03546	0	0		1	0	0
Pyrimidine derivatives	0.11547	-0.0571429	-0.0589133		0.450073	-0.243989	-0.206084		0	0	0		0	0	0
Benzimidazole	0.11547	-0.0571429	-0.0589133		0.853483	-0.289223	-0.56426		1.51338	0	0		1	0	0
Anthracene	0.11547	-0.0571429	-0.0589133		0.822897	-0.232007	-0.590891		1.61449	0	0		1	0	0
Aryl	0.109639	0.0490229	-0.158159		0.0741848	0.074124	-0.148309		0	0	-0.130477		0	0	1
Fused unsaturated heterocycles	0.104282	-0.073939	-0.0311018		0.150285	-0.164655	0.0143697		0	0	0		0	0	0
Urea derivatives	0.1006	-0.0485207	-0.0525769		0.10465	0.19171	-0.29636		0	0	-0.156802		0	0	1
Precursors quinoid compounds	0.0974235	-0.0808781	-0.0173749		0.195008	-0.299347	0.104338		0	-0.483555	0		0	1	0
Cyanohydrin	0.0941742	-0.0466041	-0.0480481		1.05792	-0.417655	-0.640261		1.66073	0	0		1	0	0
Benzodioxole	0.0941742	-0.0466041	-0.0480481		0.654592	-0.175762	-0.47883		1.10474	0	0		1	0	0
Dioxane	0.0941742	-0.0466041	-0.0480481		0.654693	-0.17585	-0.478844		1.09995	0	0		1	0	0
Imidazopyridine	0.0941742	-0.0466041	-0.0480481		0.84251	-0.389717	-0.452793		0	0	0		0	0	0
Sulfonate ester	0.0941742	-0.0466041	-0.0480481		1.1885	-0.536671	-0.651833		2.21499	0	0		1	0	0
Aziridine	0.0941742	-0.0466041	-0.0480481		0.325107	-0.0862508	-0.238857		0	0	0		0	0	0
Dihydroindolone	0.0941742	-0.0466041	-0.0480481		0.325138	-0.0862835	-0.238855		0	0	0		0	0	0
Pyrroline	0.0941742	-0.0466041	-0.0480481		0.325135	-0.0862783	-0.238857		0	0	0		0	0	0
Thiophosphate	0.0941742	-0.0466041	-0.0480481		1.03763	-0.462183	-0.57545		1.67195	0	0		1	0	0
Dianilines	0.0941742	-0.0466041	-0.0480481		1.13768	-0.80088	-0.336804		2.11344	0	0		1	0	0
Quinoline/Isoquinoline	0.0941742	-0.0466041	-0.0480481		0.524005	-0.280778	-0.243227		0	0	0		0	0	0
N-Nitroso	0.0941742	-0.0466041	-0.0480481		1.03965	-0.46911	-0.57054		2.20767	0	0		1	0	0
Phenanthrene	0.0941742	-0.0466041	-0.0480481		0.702434	-0.253076	-0.449358		0.449138	0	0		1	0	0
Fused unsaturated carbocycles	0.066516	-0.0329169	-0.0339367		1.43511	-0.407523	-1.02759		2.3836	0	0		1	0	0
Sulfinic acid	0.066516	-0.0329169	-0.0339367		0.774213	-0.295841	-0.478373		0	0	0		0	0	0
Sulfonylhydrazide	0.066516	-0.0329169	-0.0339367		1.03571	-0.401708	-0.634004		1.27453	0	0		1	0	0
Maleimide	0.066516	-0.0329169	-0.0339367		0.502937	-0.244343	-0.258595		0	0	0		0	0	0
Isothiocyanate	0.066516	-0.0329169	-0.0339367		1.21188	-0.524287	-0.687589		1.85849	0	0		1	0	0
Hemiacetal	0.066516	-0.0329169	-0.0339367		1.08252	-0.384313	-0.698208		1.37144	0	0		1	0	0
Epoxide	0.066516	-0.0329169	-0.0339367		1.45561	-0.837483	-0.61813		2.63495	0	0		1	0	0
Alkenyl halide	0.066516	-0.0329169	-0.0339367		0.331582	-0.176961	-0.15462		0	0	0		0	0	0
Bridged-ring heterocycles	0.066516	-0.0329169	-0.0339367		0.473111	-0.261336	-0.211776		0	0	0		0	0	0
Heterocyclic spiro rings	0.066516	-0.0329169	-0.0339367		0.473142	-0.261355	-0.211786		0	0	0		0	0	0
Indoldione	0.066516	-0.0329169	-0.0339367		0.31876	-0.0213244	-0.297435		0	0	0		0	0	0
N-Oxide	0.066516	-0.0329169	-0.0339367		0.555646	-0.276108	-0.279537		0	0	0		0	0	0
Azide	0.066516	-0.0329169	-0.0339367		0.538647	-0.257355	-0.281292		0	0	0		0	0	0
Fused saturated carbocycles	0.066516	-0.0329169	-0.0339367		1.15004	-0.262147	-0.887891		1.52904	0	0		1	0	0
Oxetane	0.066516	-0.0329169	-0.0339367		1.15048	-0.262301	-0.888179		1.47201	0	0		1	0	0
Phosphor (di)(three)amide	0.066516	-0.0329169	-0.0339367		0.920594	-0.260234	-0.66036		0.859088	0	0		1	0	0
Semicarbazide	0.066516	-0.0329169	-0.0339367		0.624477	-0.330737	-0.29374		0	0	0		0	0	0
Tetralin	0.066516	-0.0329169	-0.0339367		0.418793	-0.129521	-0.289272		0	0	0		0	0	0
Chromene	0.066516	-0.0329169	-0.0339367		0.328275	-0.0622027	-0.266072		0.0708899	0	0		1	0	0
Coumaran	0.066516	-0.0329169	-0.0339367		0.328314	-0.062246	-0.266068		0.0517479	0	0		1	0	0
Dihydrofuran	0.066516	-0.0329169	-0.0339367		0.328355	-0.0622755	-0.266079		0.025591	0	0		1	0	0
Dihydrofurobenzofuran	0.066516	-0.0329169	-0.0339367		0.328397	-0.0622904	-0.266107		0.00978713	0	0		1	0	0
Aminoaniline, meta	0.066516	-0.0329169	-0.0339367		0.977414	-0.514172	-0.463242		0.996932	0	0		1	0	0
Fluorene	0.066516	-0.0329169	-0.0339367		1.00497	-0.278926	-0.726049		1.14802	0	0		1	0	0
Phosphite ester	0.066516	-0.0329169	-0.0339367		1.21188	-0.524287	-0.687589		1.8585	0	0		1	0	0
AlkoxySilane	0.066516	-0.0329169	-0.0339367		1.26594	-0.344369	-0.921568		2.32376	0	0		1	0	0
Fused carbocyclic aromatic	0.0629179	-0.0909538	0.0271031		0.20613	-0.264526	0.0583956		0.359003	-0.594997	0		1	1	0
Saturated heterocyclic amine	0.0625068	0.0281847	-0.0904025		-0.00682584	0.40985	-0.403024		0	0	-0.580485		0	0	1
Benzyl	0.0625068	-0.0104388	-0.0521751		0.417094	-0.00810482	-0.408989		0.449484	0	-0.377322		1	0	1
Diketone	0.0591543	-0.073939	0.0140263		0.00168201	-0.249687	0.248005		0	0	0		0	0	0
Triazine	0.0591543	-0.073939	0.0140263		0.479517	-0.424709	-0.0548085		0.420032	0	0		1	0	0
Carbohydrate/Monosaccharide	0.0591543	0.0172524	-0.0762298		0.250579	0.273937	-0.524516		0	0	-0.724546		0	0	1
Thioalcohol	0.0573423	-0.0571429	-0.000785511		0.226238	-0.433413	0.207175		0	0	0		0	0	0
Cyclo conjugated system	0.0573423	-0.0571429	-0.000785511		0.3759	-0.262812	-0.113088		0	0	0		0	0	0
Sulfen amide	0.0573423	-0.0571429	-0.000785511		0.574221	-0.781887	0.207666		0.381829	-0.801681	0		1	1	0
Indoline	0.0573423	-0.0571429	-0.000785511		0.190332	-0.46497	0.274639		0	0	0		0	0	0
Acetal	0.0573423	-0.0571429	-0.000785511		0.211385	-0.212711	0.00132661		0	0	0		0	0	0
Anthracenone/Antracendione	0.0573423	-0.0571429	-0.000785511		0.267848	-0.362235	0.0943864		0	0	0		0	0	0
Saturated heterocyclic fragment	0.0479083	-0.0968096	0.0479083		0.0119245	-0.196666	0.184742		0	-0.11737	0.134329		0	1	1
Oxolane	0.0464424	-0.0215067	-0.0251563		0.0984378	-0.0284231	-0.0700147		0	0	0		0	0	0
Aliphatic Amine, primary	0.0401284	-0.0810885	0.0401284		0.164419	-0.444532	0.280113		0	-0.465931	0		0	1	0
Biphenyl	0.0401284	-0.0810885	0.0401284		0.252135	-0.525605	0.27347		0	-0.594264	0		0	1	0
Lactone	0.0326901	-0.0660578	0.0326901		-0.152536	-0.181643	0.334179		0	0	0		0	0	0
Acrylate	0.0326901	0.0357813	-0.0681045		0.440879	0.175015	-0.615893		0.0147616	0	-1.1917		1	0	1
Tetrahydropyran	0.0326901	-0.0660578	0.0326901		0.0972543	-0.214875	0.117621		0	0	0		0	0	0
Dihydro triazinedione	0.0326901	-0.0660578	0.0326901		0.0601677	-0.248065	0.187898		0	0	0		0	0	0
Tetrahydrotriazinone/Dioxohexahydrotriazine	0.0326901	-0.0660578	0.0326901		0.060237	-0.24798	0.187743		0	0	0		0	0	0
Alkyl arenes	0.0278974	0.0221249	-0.0497953		0.0111271	0.0139259	-0.025053		0	0	0		0	0	0
Benzothiazole/Benzoisothiazole	0.0242795	0.0281847	-0.0521751		0.190311	0.215285	-0.405596		0	0	-0.484285		0	0	1
Quinoid compounds	0.0230631	-0.0466041	0.0230631		-0.193738	-0.170934	0.364673		0	0	0		0	0	0
Indole/Isoindole	0.0230631	-0.0466041	0.0230631		-0.0234775	-0.216211	0.239689		0	0	0		0	0	0
Maleate/Fumarate	0.0230631	0.0252439	-0.0480481		0.460426	-0.0181974	-0.442228		0.575032	0	0		1	0	0
Pyridine/Pyridinium ion	0.0171765	0.0509065	-0.0675608		0.0181235	0.100885	-0.119008		0	0	0		0	0	0
Dihydroxyl group	0.0151916	-0.00488377	-0.0103579		-0.0344412	0.0209437	0.0134974		0	0	0		0	0	0
Piperidine	0.0140263	0.0628481	-0.0762298		-0.140589	0.606124	-0.465536		0	1.06182	-0.0387501		0	1	1
Benzamide	0.0140263	-0.073939	0.0591543		-0.00449716	-0.46261	0.467107		0	-0.0926761	0.460922		0	1	1
Cycloalkene	0.0106431	-0.0938474	0.0822418		-0.0339522	-0.445558	0.47951		0	-0.361884	0.633821		0	1	1
Aniline	0.00905862	0.207456	-0.214387		0.142803	0.294598	-0.437401		0	0.000948506	-1.14329		0	1	1
Guanidine	0.00869383	-0.0175678	0.00869383		-0.193696	0.12872	0.0649763		-0.0957952	0	0		1	0	0
Aliphatic Amine, tertiary	0.00869383	0.013385	-0.0219416		0.254964	-0.0448906	-0.210074		0.43964	0	0		1	0	0
Fused saturated heterocycles	0.00637158	-0.0880936	0.0808185		-0.109296	-0.150629	0.259925		0	0	0.366173		0	0	1
Silane	-0.000785511	-0.0571429	0.0573423		-0.103857	-0.543778	0.647634		0	0	0.689939		0	0	1
Thiourea derivatives	-0.000785511	-0.0571429	0.0573423		-0.127644	-0.426462	0.554105		0	0	0.928759		0	0	1
Bridged-ring carbocycles	-0.000785511	-0.0571429	0.0573423		0.00550616	-0.408818	0.403312		0	0	0		0	0	0
Carbamate	-0.000785511	-0.0571429	0.0573423		-0.306776	-0.303921	0.610697		0	0	0.727354		0	0	1
Surfactants - Anionic	-0.000785511	-0.0571429	0.0573423		0.420678	-0.592194	0.171516		0	-1.02013	0		0	1	0
Triazinetrione	-0.000785511	-0.0571429	0.0573423		-0.301438	-0.277893	0.579331		0	0	1.0234		0	0	1
Azo	-0.00111468	-0.0810885	0.0813715		0.0655207	-0.638504	0.572983		0	-0.869927	1.25446		0	1	1
Terpenes	-0.00111468	-0.039418	0.0401284		-0.201861	0.185807	0.0160539		0	0	0		0	0	0
Organic amide and thioamide	-0.00178085	-0.0230311	0.0245757		-0.0885734	0.00929221	0.0792812		0	0	0		0	0	0
tert-Butyl	-0.00985649	-0.0513994	0.0607287		0.00787487	-0.108161	0.100287		0	0	0		0	0	0
Naphtalene	-0.00985649	-0.0513994	0.0607287		-0.107791	-0.253234	0.361026		0	-0.131735	0.418245		0	1	1
Ether, cyclic	-0.0121435	-0.00788746	0.0199501		-0.233918	0.159535	0.0743837		0	0	0		0	0	0
Nitrile	-0.0139478	-0.0490623	0.0625068		-0.0581815	-0.226864	0.285045		0	0	0.0108658		0	0	1
Aldehyde	-0.0177072	0.0357813	-0.0177072		-0.1164	0.35809	-0.24169		0	0.448778	0		0	1	0
Alkene	-0.0197784	0.0569641	-0.0366014		0.0800732	-0.00789405	-0.0721792		0	0	0		0	0	0
Allyl	-0.0245869	0.0496834	-0.0245869		-0.10449	0.0930976	0.0113923		0	0	0		0	0	0
Phosphate ester	-0.0251563	-0.0938474	0.118041		0.0179331	-0.542926	0.524993		0	-0.667776	0.39864		0	1	1
Aliphatic Amine, secondary	-0.0311018	0.0172524	0.0140263		-0.0716808	0.155925	-0.084244		0	0	0		0	0	0
Alkane, branched with tertiary carbon	-0.0314319	-0.0473368	0.0782832		-0.186656	-0.0402665	0.226922		0	0	0.212092		0	0	1
Thiophene	-0.0339367	-0.0329169	0.066516		-0.525645	-0.525309	1.05095		0	0	1.1429		0	0	1
Acid anhydride	-0.0339367	-0.0329169	0.066516		-0.346635	-0.218186	0.564821		0	0	0		0	0	0
Heterocyclic Phenol	-0.0339367	-0.0329169	0.066516		-0.705529	-0.390889	1.09642		0	0	1.36339		0	0	1
Benzotriazole	-0.0339367	-0.0329169	0.066516		-0.705378	-0.319702	1.02508		0	0	1.70736		0	0	1
Imidazolidine	-0.0339367	-0.0329169	0.066516		-0.387259	-0.310055	0.697314		0	0	0.147556		0	0	1
Carbodiimide	-0.0339367	-0.0329169	0.066516		-0.426956	-0.57701	1.00397		0	0	1.10076		0	0	1
Cyanamide	-0.0339367	-0.0329169	0.066516		-0.418551	-0.521036	0.939587		0	0	0.975702		0	0	1
Aliphatic peroxide	-0.0339367	-0.0329169	0.066516		-0.347305	-0.488267	0.835572		0	0	0.901339		0	0	1
Azonitrile	-0.0339367	-0.0329169	0.066516		-0.383235	-0.193476	0.576711		0	0	0		0	0	0
Pyrimidine	-0.0339367	-0.0329169	0.066516		-0.156888	-0.855394	1.01228		0	-0.683544	1.33998		0	1	1
Benzoxazole/Benzisoxazole	-0.0339367	-0.0329169	0.066516		-0.311263	-0.461722	0.772985		0	0	0.457025		0	0	1
Melamine	-0.0339367	-0.0329169	0.066516		-0.705529	-0.390888	1.09642		0	0	1.3634		0	0	1
Surfactants - Cationic	-0.0339367	-0.0329169	0.066516		-0.230936	-0.739134	0.97007		0	0	1.4906		0	0	1
Aralkyl peroxides alkyl	-0.0339367	-0.0329169	0.066516		-0.348951	-0.348795	0.697746		0	0	0.592318		0	0	1
Diaralkyl peroxides	-0.0339367	-0.0329169	0.066516		-0.348873	-0.348699	0.697572		0	0	0.58611		0	0	1
Isobenzofuran	-0.0339367	-0.0329169	0.066516		-0.678258	-0.245314	0.923573		-0.00664363	0	1.96754		1	0	1
Dioxolane	-0.0339367	-0.0329169	0.066516		-0.245193	-0.218461	0.463654		0	0	0.256045		0	0	1
Ketal	-0.0339367	-0.0329169	0.066516		-0.245148	-0.218381	0.463528		0	0	0.256005		0	0	1
Azetidine	-0.0339367	-0.0329169	0.066516		-0.0446102	-0.0732589	0.117869		0	0	0		0	0	0
Thiaazabicycloheptane, oxo	-0.0339367	-0.0329169	0.066516		-0.0446055	-0.0732566	0.117862		0	0	0		0	0	0
Thiazolidine	-0.0339367	-0.0329169	0.066516		-0.0446045	-0.0732441	0.117849		0	0	0		0	0	0
Triazole	-0.0339367	-0.0329169	0.066516		-0.454916	-0.563062	1.01798		0	0	1.09838		0	0	1
Sulfonamide	-0.0351606	-0.0313727	0.0662116		-0.0868082	-0.241609	0.328418		0	0	0.56892		0	0	1
Aryl halide	-0.0356213	0.137741	-0.100707		-0.12015	0.390876	-0.270725		0	0.799037	-0.208265		0	1	1
Ketone	-0.0423577	0.00225246	0.0401284		-0.30426	0.187997	0.116263		-0.0759545	0	0		1	0	0
Cycloalkane	-0.0432597	-0.0128752	0.0560028		-0.199384	0.252774	-0.0533903		0	0.166493	0		0	1	0
Acetoxy	-0.0469877	0.18561	-0.136719		-0.135249	0.615537	-0.480288		0	1.40917	-0.374163		0	1	1
Aromatic perhalogencarbons	-0.0480481	-0.0466041	0.0941742		-0.714096	-0.431006	1.1451		0	0	2.57542		0	0	1
Perhalogenated carbons derivatives	-0.0480481	-0.0466041	0.0941742		-0.695224	-0.322356	1.01758		0	0	1.76673		0	0	1
Lactams	-0.0480481	-0.0466041	0.0941742		-0.434431	-0.224253	0.658684		0	0	0.733337		0	0	1
Thiocarbamate	-0.0480481	0.097092	-0.0480481		-0.267616	0.793629	-0.526013		0	0.768854	0		0	1	0
Phosphonium, salt	-0.0480481	0.097092	-0.0480481		-0.410939	1.13744	-0.7265		0	2.03828	0		0	1	0
Thioamide	-0.0480481	0.097092	-0.0480481		-0.290141	0.651826	-0.361685		0	0.91487	0		0	1	0
Thiocarboxamide	-0.0480481	0.097092	-0.0480481		-0.290167	0.651852	-0.361685		0	0.909955	0		0	1	0
Benzthiazolinone/Benzoisothiazolinone	-0.0480481	0.097092	-0.0480481		-0.507348	1.2841	-0.776756		0	2.47093	0		0	1	0
Ammonium salt	-0.0521751	0.0281847	0.0242795		-0.281896	0.134258	0.147638		-0.161146	0	0		1	0	0
Oxazole/Izoxazole	-0.0589133	0.119048	-0.0589133		-0.431723	1.01515	-0.583432		0	2.51125	0		0	1	0
Morpholine	-0.0589133	0.0603175	-0.000785511		-0.457149	0.377124	0.0800245		-0.352967	0.13289	0		1	1	0
Sulfide	-0.0589133	-0.0571429	0.11547		-0.399809	-0.525028	0.924836		0	0	1.85834		0	0	1
Isopropyl	-0.0614568	-0.00488377	0.0662905		-0.241619	0.109434	0.132185		-0.360195	0	0		1	0	0
Alkyl	-0.0681045	-0.0660578	0.133485		-0.434279	-0.44	0.87428		0	0	1.50738		0	0	1
Sulfone	-0.0681045	0.0867009	-0.0177072		-0.61109	0.661218	-0.0501282		-0.473257	0.714658	0		1	1	0
Disulfide	-0.0762298	0.108444	-0.0311018		-0.437226	0.451477	-0.0142513		-0.0948311	0.870046	0		1	1	0
Ketoxime derivatives	-0.0762298	0.0628481	0.0140263		-0.462212	0.238351	0.22386		-0.346294	0	0		1	0	0
Methacrylate	-0.0870063	0.175816	-0.0870063		-0.208001	0.600089	-0.392088		0	1.39825	-0.0622311		0	1	1
Alkane branched with quaternary carbon	-0.0967551	-0.0938474	0.18964		-0.395866	-0.499612	0.895479		0	0	1.92882		0	0	1
Glycerol and derivatives	-0.102742	0.173473	-0.0689514		-0.376894	0.621247	-0.244354		0	0.979661	0		0	1	0
Alcohol	-0.106465	0.0118346	0.0947515		-0.340191	0.121343	0.218848		-0.749512	0	0		1	0	0
Carboxylic acid ester	-0.124037	0.177622	-0.0517633		-0.200819	0.200743	7.61803e-05		-0.0988018	0.0686491	0		1	1	0
Carboxylic acid	-0.185312	0.176534	0.0105893		-0.60926	0.647097	-0.037837		-1.271	1.12881	0		1	1	0
Sulfonic acid	-0.202676	0.285598	-0.0799928		-0.52925	0.572605	-0.0433552		-1.14731	0.848859	0		1	1	0
