# Supplementary figures and images for: In Silico Model for Chemical-Induced Chromosomal Damages Elucidates Mode of Action and Irrelevant Positives
Source: MDPI journal article supplement (doi:10.3390/genes11101181), 2020-10-11

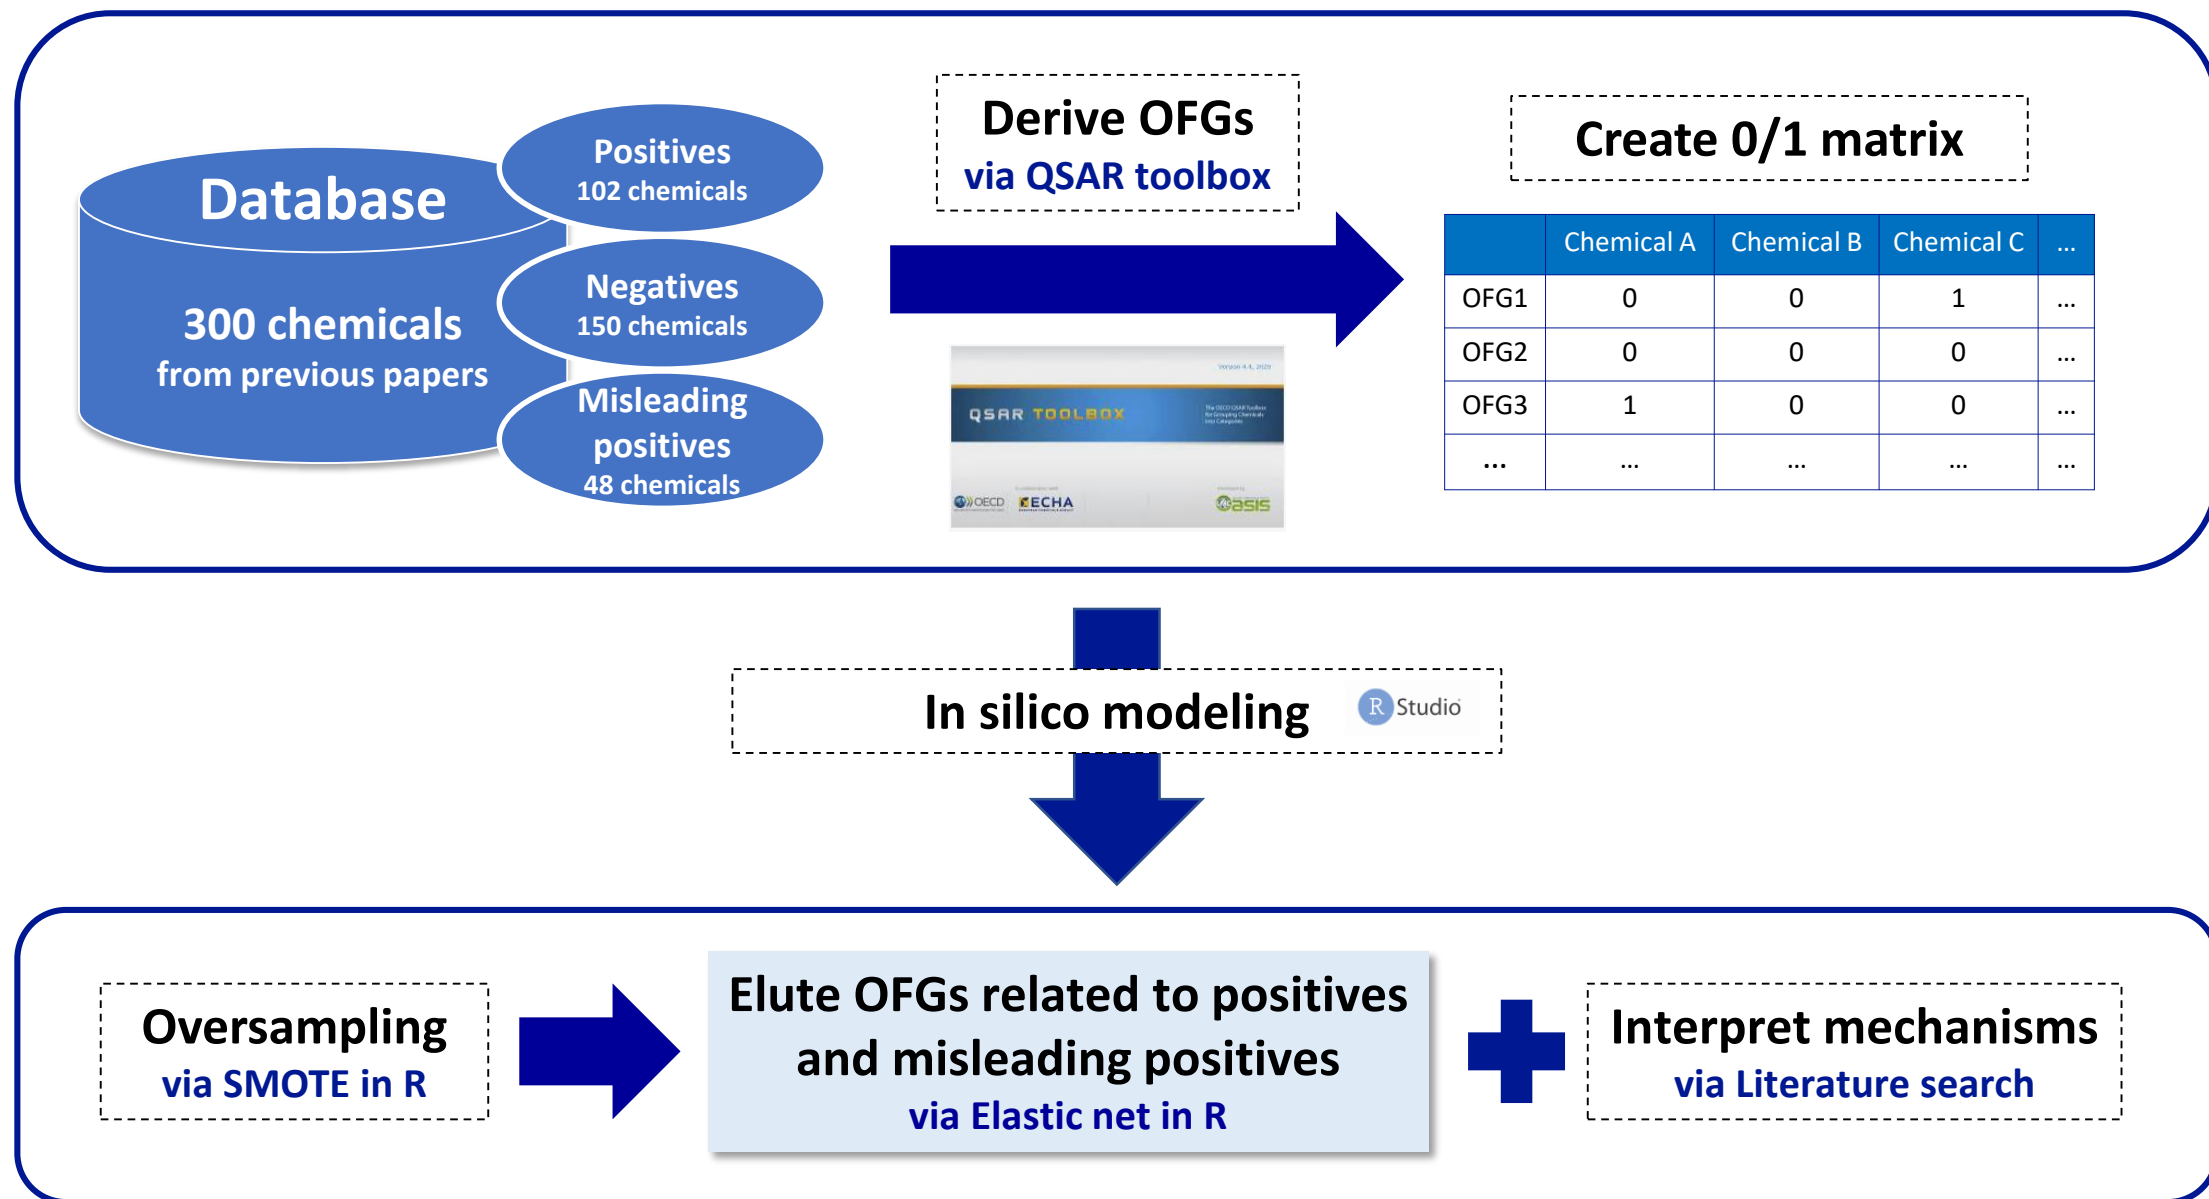

Figure S1. Graphical flow of *in silico* modeling in this study.

Supplement: s1 [file s1]
